# Supplementary material for: Fibromyalgia-related costs and loss of productivity: a substantial societal burden
Source: PubMed Central journal article supplement (PMC4833946; doi:10.1186/s12891-016-1027-6), 2016-04-16
Supplement: 12891_2016_1027_MOESM1_ESM.pdf [file 12891_2016_1027_MOESM1_ESM.pdf]

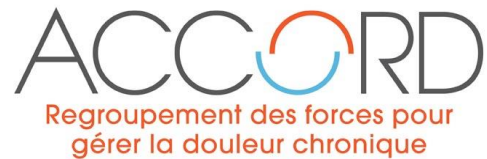

## Questionnaire téléphonique sur l'utilisation de ressources de santé et la perte de productivité

### Instructions :

- Avant de débuter le questionnaire téléphonique, veuillez s.v.p. avoir devant vous TOUS les médicaments que vous utilisez actuellement.
- TOUTES les informations que nous vous demanderons aujourd'hui concernent les 3 DERNIERS MOIS → *Donc depuis \_\_\_\_\_ environ!*

ID patient :

 - 

Entrevue :

T<sub>0</sub>

T<sub>1</sub>

T<sub>2</sub>

T<sub>3</sub>

T<sub>4</sub>

Date :

 -  - 20  
Jour      Mois (ex: JUN)      Année

Interviewer :

A. Lacasse

\_\_\_\_\_



**2. VISITES À L'URGENCE**

**Au cours des 3 derniers mois, avez-vous eu des visites à l'urgence à cause de votre douleur?** <sub>1</sub> Oui <sub>0</sub> Non

**2.1. Si oui :** Combien de fois avez-vous été à l'urgence?    Nombre de fois : \_\_\_\_\_

**2.2. Si oui :** Veuillez s.v.p. me préciser les dates de ces visites, la durée, les raisons, la distance approximative entre l'urgence et votre foyer, le moyen de transport utilisé pour vous y rendre ainsi que les frais de stationnement déboursés s'il y a lieu :

| <b>DATE</b><br>JOUR-MOIS-ANNÉE | <b>DURÉE</b> | <b>RAISON(S)</b> | <b>DISTANCE DE<br/>VOTRE FOYER</b> | <b>MOYEN DE TRANSPORT</b><br>EX: VOITURE, TAXI, AUTOBUS, ETC. | <b>FRAIS DE<br/>STATIONNEMENT</b> |
|--------------------------------|--------------|------------------|------------------------------------|---------------------------------------------------------------|-----------------------------------|
| .....                          | .....jours   | .....            | .....km                            | .....                                                         | .....\$                           |
| .....                          | .....jours   | .....            | .....km                            | .....                                                         | .....\$                           |
| .....                          | .....jours   | .....            | .....km                            | .....                                                         | .....\$                           |
| .....                          | .....jours   | .....            | .....km                            | .....                                                         | .....\$                           |
| .....                          | .....jours   | .....            | .....km                            | .....                                                         | .....\$                           |

### 3. VISITES CHEZ LE MÉDECIN

**Au cours des 3 derniers mois, avez-vous consulté un médecin à cause de votre douleur?** <sub>1</sub> Oui <sub>0</sub> Non

**3.1. Si oui :** Combien de visites avez-vous eues chez les différents médecins suivants :

|                                      |                        |
|--------------------------------------|------------------------|
| - Médecin de famille (omnipraticien) | Nombre de fois : _____ |
| - Anesthésiste                       | Nombre de fois : _____ |
| - Neurochirurgien                    | Nombre de fois : _____ |
| - Neurologue                         | Nombre de fois : _____ |
| - Orthopédiste                       | Nombre de fois : _____ |
| - Physiatre                          | Nombre de fois : _____ |
| - Psychiatre                         | Nombre de fois : _____ |
| - Radiologiste                       | Nombre de fois : _____ |
| - Rhumatologue                       | Nombre de fois : _____ |
| - Clinique de la douleur             | Nombre de fois : _____ |
| - Autre : _____                      | Nombre de fois : _____ |

**3.2. Si oui :** Veuillez s.v.p. me préciser les dates, le type de médecin rencontré, les raisons de ces visites, la distance approximative entre les cliniques médicales et votre foyer, le moyen de transport utilisé pour vous y rendre ainsi que les frais de stationnement déboursés s'il y a lieu :

| DATE<br>JOUR-MOIS-ANNÉE | TYPE DE<br>MÉDECIN | RAISON(S) | DISTANCE DE<br>VOTRE FOYER | MOYEN DE<br>TRANSPORT<br><small>EX : VOITURE, TAXI, AUTOBUS, ETC.</small> | FRAIS DE<br>STATIONNEMENT |
|-------------------------|--------------------|-----------|----------------------------|---------------------------------------------------------------------------|---------------------------|
| .....                   | .....              | .....     | .....km                    | .....                                                                     | .....\$                   |
| .....                   | .....              | .....     | .....km                    | .....                                                                     | .....\$                   |
| .....                   | .....              | .....     | .....km                    | .....                                                                     | .....\$                   |
| .....                   | .....              | .....     | .....km                    | .....                                                                     | .....\$                   |
| .....                   | .....              | .....     | .....km                    | .....                                                                     | .....\$                   |

#### 4. VISITES CHEZ UN AUTRE PROFESSIONNEL DE LA SANTÉ

**Au cours des 3 derniers mois, avez-vous consulté un autre professionnel de la santé à cause de votre douleur?** <sub>1</sub> Oui <sub>0</sub> Non

**4.1. Si oui :** Combien de visites avez-vous eues chez ces différents professionnels :

|                                   |                        |
|-----------------------------------|------------------------|
| - Infirmière                      | Nombre de fois : _____ |
| - Acupuncteur                     | Nombre de fois : _____ |
| - Art-thérapeute                  | Nombre de fois : _____ |
| - Chiropraticien                  | Nombre de fois : _____ |
| - Ergothérapeute                  | Nombre de fois : _____ |
| - Homéopathe                      | Nombre de fois : _____ |
| - Hypnothérapeute                 | Nombre de fois : _____ |
| - Kinésologue / Kinésiothérapeute | Nombre de fois : _____ |
| - Massothérapeute                 | Nombre de fois : _____ |
| - Naturopathe                     | Nombre de fois : _____ |
| - Ostéopathe                      | Nombre de fois : _____ |
| - Pharmacien                      | Nombre de fois : _____ |
| - Physiothérapeute                | Nombre de fois : _____ |
| - Psychologue                     | Nombre de fois : _____ |
| - Travailleur social              | Nombre de fois : _____ |
| - Autre : _____                   | Nombre de fois : _____ |



## INTERVENTIONS POUR VOTRE DOULEUR

1. **Au cours des 3 derniers mois**, est-ce que vous avez subi une intervention afin de soulager/traiter **VOTRE DOULEUR**?

Exemples : Infiltration, Bloc, Chirurgie, Implant d'une pompe, Péridurale, etc.

<sub>1</sub> Oui    <sub>0</sub> Non

1.1. Si oui, précisez :

| Date<br>JOUR-MOIS-ANNÉE | Type d'intervention |
|-------------------------|---------------------|
| .....                   | .....               |
| .....                   | .....               |
| .....                   | .....               |
| .....                   | .....               |
| .....                   | .....               |
| .....                   | .....               |
| .....                   | .....               |

|                                         |
|-----------------------------------------|
| Injection épidurale                     |
| Infusion épidurale continue             |
| Bloc caudal/épidurale caudale           |
| Injection intradiscale                  |
| Bloc facettaire                         |
| Bloc branche médiane                    |
| Bloc foraminal                          |
| Bloc paravertébral                      |
| Bloc du nerf d'Arnold                   |
| Bloc d'un nerf intercostal              |
| Bloc d'un nerf périphérique             |
| Injection de point gachette             |
| Injection intra-articulaire             |
| Bloc régional intraveineux/bloc veineux |
| Injection de toxine botulinique         |
| Injection intrathécale                  |
| Infusion intrathécale continue          |
| Neurostimulation moelle épinière        |
| Bloc sympathique (anesthésique local)   |
| stellaire                               |
| coeliaque                               |
| lombaire                                |
| ganglion impar                          |
| Bloc sympathique (agent neurolytique)   |
| stellaire                               |
| coeliaque                               |
| lombaire                                |
| ganglion impar                          |
| Neurolyse intrathécale                  |
| Neurolyse branche médiane               |
| Neurolyse nerf périphérique             |
| IDET                                    |
| Coblation                               |
| Infiltration subcitruciale              |
| Infiltration musculaire                 |
| Perfusion zylocaïne                     |

## ACHAT DE MÉDICAMENTS EN VENTE LIBRE POUR VOTRE DOULEUR

1. **Au cours des 3 derniers mois**, est-ce que vous ou un membre de votre famille avez acheté des médicaments **en vente libre** afin de soulager/traiter **VOTRE DOULEUR**? *Exemples : Advil®, Motrin®, Tylenol®, etc.*

<sub>1</sub> Oui <sub>0</sub> Non

**ATTENTION : Médicaments qui ne nécessitent pas la prescription d'un médecin lors de l'achat.**

### 1.1. Si oui, précisez :

| Date<br>Jour-Mois-Année | Nom du médicament<br>pour votre douleur | Coût total<br>incluant les<br>taxes | NB<br>d'achats<br>depuis les<br>3 derniers<br>mois | Allez-vous être<br>remboursé(e)?                          | Si oui, % <u>ou</u><br>montant<br>remboursé? | Source du<br>remboursement?<br>Ex: RAMQ, assureur<br>privé, CSST, etc. | Utilisé<br>actuellement?                                  | Dose | Unités                                                                                                                      | Fréquence                                                                                                |
|-------------------------|-----------------------------------------|-------------------------------------|----------------------------------------------------|-----------------------------------------------------------|----------------------------------------------|------------------------------------------------------------------------|-----------------------------------------------------------|------|-----------------------------------------------------------------------------------------------------------------------------|----------------------------------------------------------------------------------------------------------|
| .....                   | .....                                   | .....\$                             | ..... x                                            | <input type="checkbox"/> Oui <input type="checkbox"/> Non | .....                                        | .....                                                                  | <input type="checkbox"/> Oui <input type="checkbox"/> Non |      | <input type="checkbox"/> <sub>0</sub> mg <input type="checkbox"/> <sub>1</sub> mcg <input type="checkbox"/> <sub>2</sub> ui | ____ fois par:<br><input type="checkbox"/> jr <input type="checkbox"/> sem <input type="checkbox"/> mois |
| .....                   | .....                                   | .....\$                             | ..... x                                            | <input type="checkbox"/> Oui <input type="checkbox"/> Non | .....                                        | .....                                                                  | <input type="checkbox"/> Oui <input type="checkbox"/> Non |      | <input type="checkbox"/> <sub>0</sub> mg <input type="checkbox"/> <sub>1</sub> mcg <input type="checkbox"/> <sub>2</sub> ui | ____ fois par:<br><input type="checkbox"/> jr <input type="checkbox"/> sem <input type="checkbox"/> mois |
| .....                   | .....                                   | .....\$                             | ..... x                                            | <input type="checkbox"/> Oui <input type="checkbox"/> Non | .....                                        | .....                                                                  | <input type="checkbox"/> Oui <input type="checkbox"/> Non |      | <input type="checkbox"/> <sub>0</sub> mg <input type="checkbox"/> <sub>1</sub> mcg <input type="checkbox"/> <sub>2</sub> ui | ____ fois par:<br><input type="checkbox"/> jr <input type="checkbox"/> sem <input type="checkbox"/> mois |
| .....                   | .....                                   | .....\$                             | ..... x                                            | <input type="checkbox"/> Oui <input type="checkbox"/> Non | .....                                        | .....                                                                  | <input type="checkbox"/> Oui <input type="checkbox"/> Non |      | <input type="checkbox"/> <sub>0</sub> mg <input type="checkbox"/> <sub>1</sub> mcg <input type="checkbox"/> <sub>2</sub> ui | ____ fois par:<br><input type="checkbox"/> jr <input type="checkbox"/> sem <input type="checkbox"/> mois |
| .....                   | .....                                   | .....\$                             | ..... x                                            | <input type="checkbox"/> Oui <input type="checkbox"/> Non | .....                                        | .....                                                                  | <input type="checkbox"/> Oui <input type="checkbox"/> Non |      | <input type="checkbox"/> <sub>0</sub> mg <input type="checkbox"/> <sub>1</sub> mcg <input type="checkbox"/> <sub>2</sub> ui | ____ fois par:<br><input type="checkbox"/> jr <input type="checkbox"/> sem <input type="checkbox"/> mois |



2. [ *Mis à part ce qui est mentionné ci-haut* (les nommer si applicable) ] Utilisez-vous actuellement des médicaments **en vente libre** afin de soulager/traiter **VOTRE DOULEUR?**

<sub>1</sub> Oui    <sub>0</sub> Non

2.1. Si oui, précisez :

| Date<br>Jour-Mois-Année | Nom du médicament<br>pour votre douleur | Coût<br>total<br>incluant<br>les<br>taxes | NB<br>d'achats<br>depuis la<br>dernière<br>entrevue | Utilisé<br>actuellement?                                  | Dose | Unités                                                                                                                      | Fréquence                                                                                               |
|-------------------------|-----------------------------------------|-------------------------------------------|-----------------------------------------------------|-----------------------------------------------------------|------|-----------------------------------------------------------------------------------------------------------------------------|---------------------------------------------------------------------------------------------------------|
| .....                   | .....                                   | 0 \$                                      | 0 x                                                 | <input type="checkbox"/> Oui <input type="checkbox"/> Non |      | <input type="checkbox"/> <sub>0</sub> mg <input type="checkbox"/> <sub>1</sub> mcg <input type="checkbox"/> <sub>2</sub> ui | ___ fois par:<br><input type="checkbox"/> jr <input type="checkbox"/> sem <input type="checkbox"/> mois |
| .....                   | .....                                   | 0 \$                                      | 0 x                                                 | <input type="checkbox"/> Oui <input type="checkbox"/> Non |      | <input type="checkbox"/> <sub>0</sub> mg <input type="checkbox"/> <sub>1</sub> mcg <input type="checkbox"/> <sub>2</sub> ui | ___ fois par:<br><input type="checkbox"/> jr <input type="checkbox"/> sem <input type="checkbox"/> mois |
| .....                   | .....                                   | 0 \$                                      | 0 x                                                 | <input type="checkbox"/> Oui <input type="checkbox"/> Non |      | <input type="checkbox"/> <sub>0</sub> mg <input type="checkbox"/> <sub>1</sub> mcg <input type="checkbox"/> <sub>2</sub> ui | ___ fois par:<br><input type="checkbox"/> jr <input type="checkbox"/> sem <input type="checkbox"/> mois |
| .....                   | .....                                   | 0 \$                                      | 0 x                                                 | <input type="checkbox"/> Oui <input type="checkbox"/> Non |      | <input type="checkbox"/> <sub>0</sub> mg <input type="checkbox"/> <sub>1</sub> mcg <input type="checkbox"/> <sub>2</sub> ui | ___ fois par:<br><input type="checkbox"/> jr <input type="checkbox"/> sem <input type="checkbox"/> mois |
| .....                   | .....                                   | 0 \$                                      | 0 x                                                 | <input type="checkbox"/> Oui <input type="checkbox"/> Non |      | <input type="checkbox"/> <sub>0</sub> mg <input type="checkbox"/> <sub>1</sub> mcg <input type="checkbox"/> <sub>2</sub> ui | ___ fois par:<br><input type="checkbox"/> jr <input type="checkbox"/> sem <input type="checkbox"/> mois |
| .....                   | .....                                   | 0 \$                                      | 0 x                                                 | <input type="checkbox"/> Oui <input type="checkbox"/> Non |      | <input type="checkbox"/> <sub>0</sub> mg <input type="checkbox"/> <sub>1</sub> mcg <input type="checkbox"/> <sub>2</sub> ui | ___ fois par:<br><input type="checkbox"/> jr <input type="checkbox"/> sem <input type="checkbox"/> mois |

## ACHAT DE MÉDICAMENTS PRESCRITS POUR VOTRE DOULEUR

1. **Au cours des 3 derniers mois**, est-ce que vous ou un membre de votre famille avez acheté des **médicaments prescrits** afin de soulager/traiter **VOTRE DOULEUR**?

Exemples : Naproxène, Amitriptyline (Elavil®), Pregabaline (Lyrica®), etc.

<sub>1</sub> Oui <sub>0</sub> Non

**ATTENTION : Certains médicaments tels que les antidépresseurs et les anticonvulsivants peuvent être prescrits pour la douleur.**

**Si le sujet a acheté un médicament de ce genre, DEMANDER s'il souffre de dépression ou d'épilepsie?**

**NE PAS INSCRIRE les médicaments non reliés à la douleur.**

Exemples : Antidépresseur pour la dépression uniquement OU Anticonvulsivant pour l'épilepsie uniquement.

**Si le patient ne sait pas si son médicament est pour la dépression ou la douleur l'INSCRIRE.**

### 1.1. Si oui, précisez :

| Date<br>Jour-Mois-Année | Nom du médicament<br>pour votre douleur | NB d'achats<br>depuis les 3<br>derniers<br>mois | Allez-vous être<br>remboursé(e)?                          | Si oui, % <u>ou</u><br>montant<br>remboursé? | Source du<br>remboursement?<br>Ex: RAMQ, assureur<br>privé, CSST, etc. | Utilisé<br>actuellement?                                  | Dose | Unités                                                                                                                      | Fréquence                                                                                                |
|-------------------------|-----------------------------------------|-------------------------------------------------|-----------------------------------------------------------|----------------------------------------------|------------------------------------------------------------------------|-----------------------------------------------------------|------|-----------------------------------------------------------------------------------------------------------------------------|----------------------------------------------------------------------------------------------------------|
| .....                   | .....                                   | ..... x                                         | <input type="checkbox"/> Oui <input type="checkbox"/> Non | .....                                        | .....                                                                  | <input type="checkbox"/> Oui <input type="checkbox"/> Non |      | <input type="checkbox"/> <sub>0</sub> mg <input type="checkbox"/> <sub>1</sub> mcg <input type="checkbox"/> <sub>2</sub> ui | ____ fois par:<br><input type="checkbox"/> jr <input type="checkbox"/> sem <input type="checkbox"/> mois |
| .....                   | .....                                   | ..... x                                         | <input type="checkbox"/> Oui <input type="checkbox"/> Non | .....                                        | .....                                                                  | <input type="checkbox"/> Oui <input type="checkbox"/> Non |      | <input type="checkbox"/> <sub>0</sub> mg <input type="checkbox"/> <sub>1</sub> mcg <input type="checkbox"/> <sub>2</sub> ui | ____ fois par:<br><input type="checkbox"/> jr <input type="checkbox"/> sem <input type="checkbox"/> mois |
| .....                   | .....                                   | ..... x                                         | <input type="checkbox"/> Oui <input type="checkbox"/> Non | .....                                        | .....                                                                  | <input type="checkbox"/> Oui <input type="checkbox"/> Non |      | <input type="checkbox"/> <sub>0</sub> mg <input type="checkbox"/> <sub>1</sub> mcg <input type="checkbox"/> <sub>2</sub> ui | ____ fois par:<br><input type="checkbox"/> jr <input type="checkbox"/> sem <input type="checkbox"/> mois |

(suite)

| Date<br>Jour-Mois-Année | Nom du médicament<br>pour votre douleur | NB d'achats<br>depuis les 3<br>derniers<br>mois | Allez-vous être<br>remboursé(e)?                          | Si oui, % <u>ou</u><br>montant<br>remboursé? | Source du<br>remboursement?<br>Ex: RAMQ, assureur<br>privé, CSST, etc. | Utilisé<br>actuellement?                                  | Dose | Unités                                                                                     | Fréquence                                                                                               |
|-------------------------|-----------------------------------------|-------------------------------------------------|-----------------------------------------------------------|----------------------------------------------|------------------------------------------------------------------------|-----------------------------------------------------------|------|--------------------------------------------------------------------------------------------|---------------------------------------------------------------------------------------------------------|
| .....                   | .....                                   | ..... x                                         | <input type="checkbox"/> Oui <input type="checkbox"/> Non | .....                                        | .....                                                                  | <input type="checkbox"/> Oui <input type="checkbox"/> Non |      | <input type="checkbox"/> 0 mg <input type="checkbox"/> 1 mcg <input type="checkbox"/> 2 ui | ___ fois par:<br><input type="checkbox"/> jr <input type="checkbox"/> sem <input type="checkbox"/> mois |
| .....                   | .....                                   | ..... x                                         | <input type="checkbox"/> Oui <input type="checkbox"/> Non | .....                                        | .....                                                                  | <input type="checkbox"/> Oui <input type="checkbox"/> Non |      | <input type="checkbox"/> 0 mg <input type="checkbox"/> 1 mcg <input type="checkbox"/> 2 ui | ___ fois par:<br><input type="checkbox"/> jr <input type="checkbox"/> sem <input type="checkbox"/> mois |
| .....                   | .....                                   | ..... x                                         | <input type="checkbox"/> Oui <input type="checkbox"/> Non | .....                                        | .....                                                                  | <input type="checkbox"/> Oui <input type="checkbox"/> Non |      | <input type="checkbox"/> 0 mg <input type="checkbox"/> 1 mcg <input type="checkbox"/> 2 ui | ___ fois par:<br><input type="checkbox"/> jr <input type="checkbox"/> sem <input type="checkbox"/> mois |
| .....                   | .....                                   | ..... x                                         | <input type="checkbox"/> Oui <input type="checkbox"/> Non | .....                                        | .....                                                                  | <input type="checkbox"/> Oui <input type="checkbox"/> Non |      | <input type="checkbox"/> 0 mg <input type="checkbox"/> 1 mcg <input type="checkbox"/> 2 ui | ___ fois par:<br><input type="checkbox"/> jr <input type="checkbox"/> sem <input type="checkbox"/> mois |
| .....                   | .....                                   | ..... x                                         | <input type="checkbox"/> Oui <input type="checkbox"/> Non | .....                                        | .....                                                                  | <input type="checkbox"/> Oui <input type="checkbox"/> Non |      | <input type="checkbox"/> 0 mg <input type="checkbox"/> 1 mcg <input type="checkbox"/> 2 ui | ___ fois par:<br><input type="checkbox"/> jr <input type="checkbox"/> sem <input type="checkbox"/> mois |
| .....                   | .....                                   | ..... x                                         | <input type="checkbox"/> Oui <input type="checkbox"/> Non | .....                                        | .....                                                                  | <input type="checkbox"/> Oui <input type="checkbox"/> Non |      | <input type="checkbox"/> 0 mg <input type="checkbox"/> 1 mcg <input type="checkbox"/> 2 ui | ___ fois par:<br><input type="checkbox"/> jr <input type="checkbox"/> sem <input type="checkbox"/> mois |
| .....                   | .....                                   | ..... x                                         | <input type="checkbox"/> Oui <input type="checkbox"/> Non | .....                                        | .....                                                                  | <input type="checkbox"/> Oui <input type="checkbox"/> Non |      | <input type="checkbox"/> 0 mg <input type="checkbox"/> 1 mcg <input type="checkbox"/> 2 ui | ___ fois par:<br><input type="checkbox"/> jr <input type="checkbox"/> sem <input type="checkbox"/> mois |
| .....                   | .....                                   | ..... x                                         | <input type="checkbox"/> Oui <input type="checkbox"/> Non | .....                                        | .....                                                                  | <input type="checkbox"/> Oui <input type="checkbox"/> Non |      | <input type="checkbox"/> 0 mg <input type="checkbox"/> 1 mcg <input type="checkbox"/> 2 ui | ___ fois par:<br><input type="checkbox"/> jr <input type="checkbox"/> sem <input type="checkbox"/> mois |

**1.2. Si oui, au cours des 3 derniers mois, est-ce que vous ou un membre de votre famille avez acheté des **médicaments prescrits afin de soulager les effets indésirables des médicaments pour VOTRE DOULEUR?****

*Exemples : Antiacides, laxatifs... : Senokot®, Nexium®, Prevacid®, Losec®, Pantoloc®, Pepcid®, Zantac®, etc.*

**ATTENTION : Ne pas inscrire les médicaments non reliés à la prise de médicaments pour la douleur.**

*Exemple : Laxatif pour un problème de constipation chronique.*

| Date<br>Jour-Mois-Année | Nom du médicament<br>pour votre douleur | NB d'achats<br>depuis les 3<br>derniers<br>mois | Allez-vous être<br>remboursé(e)?                          | Si oui, % <u>ou</u><br>montant<br>remboursé? | Source du<br>remboursement?<br>Ex: RAMQ, assureur<br>privé, CSST, etc. | Utilisé<br>actuellement?                                  | Dose | Unités                                                                                     | Fréquence                                                                                               |
|-------------------------|-----------------------------------------|-------------------------------------------------|-----------------------------------------------------------|----------------------------------------------|------------------------------------------------------------------------|-----------------------------------------------------------|------|--------------------------------------------------------------------------------------------|---------------------------------------------------------------------------------------------------------|
| .....                   | .....                                   | ..... x                                         | <input type="checkbox"/> Oui <input type="checkbox"/> Non | .....                                        | .....                                                                  | <input type="checkbox"/> Oui <input type="checkbox"/> Non |      | <input type="checkbox"/> 0 mg <input type="checkbox"/> 1 mcg <input type="checkbox"/> 2 ui | ___ fois par:<br><input type="checkbox"/> jr <input type="checkbox"/> sem <input type="checkbox"/> mois |
| .....                   | .....                                   | ..... x                                         | <input type="checkbox"/> Oui <input type="checkbox"/> Non | .....                                        | .....                                                                  | <input type="checkbox"/> Oui <input type="checkbox"/> Non |      | <input type="checkbox"/> 0 mg <input type="checkbox"/> 1 mcg <input type="checkbox"/> 2 ui | ___ fois par:<br><input type="checkbox"/> jr <input type="checkbox"/> sem <input type="checkbox"/> mois |
| .....                   | .....                                   | ..... x                                         | <input type="checkbox"/> Oui <input type="checkbox"/> Non | .....                                        | .....                                                                  | <input type="checkbox"/> Oui <input type="checkbox"/> Non |      | <input type="checkbox"/> 0 mg <input type="checkbox"/> 1 mcg <input type="checkbox"/> 2 ui | ___ fois par:<br><input type="checkbox"/> jr <input type="checkbox"/> sem <input type="checkbox"/> mois |
| .....                   | .....                                   | ..... x                                         | <input type="checkbox"/> Oui <input type="checkbox"/> Non | .....                                        | .....                                                                  | <input type="checkbox"/> Oui <input type="checkbox"/> Non |      | <input type="checkbox"/> 0 mg <input type="checkbox"/> 1 mcg <input type="checkbox"/> 2 ui | ___ fois par:<br><input type="checkbox"/> jr <input type="checkbox"/> sem <input type="checkbox"/> mois |
| .....                   | .....                                   | ..... x                                         | <input type="checkbox"/> Oui <input type="checkbox"/> Non | .....                                        | .....                                                                  | <input type="checkbox"/> Oui <input type="checkbox"/> Non |      | <input type="checkbox"/> 0 mg <input type="checkbox"/> 1 mcg <input type="checkbox"/> 2 ui | ___ fois par:<br><input type="checkbox"/> jr <input type="checkbox"/> sem <input type="checkbox"/> mois |



2. [ *Mis à part ce qui est mentionné ci-haut* (les nommer si applicable) ] Utilisez-vous actuellement des **produits naturels** afin de soulager/traiter **VOTRE DOULEUR**?

<sub>1</sub> Oui    <sub>0</sub> Non

2.1. Si oui, précisez :

| Date<br>Jour-Mois-Année | Nom du produit naturel pour votre<br>douleur | Coût total<br>incluant les<br>taxes | Utilisé<br>actuellement?                                  |
|-------------------------|----------------------------------------------|-------------------------------------|-----------------------------------------------------------|
| .....                   | .....                                        | 0 \$                                | <input type="checkbox"/> Oui <input type="checkbox"/> Non |
| .....                   | .....                                        | 0 \$                                | <input type="checkbox"/> Oui <input type="checkbox"/> Non |
| .....                   | .....                                        | 0 \$                                | <input type="checkbox"/> Oui <input type="checkbox"/> Non |
| .....                   | .....                                        | 0 \$                                | <input type="checkbox"/> Oui <input type="checkbox"/> Non |
| .....                   | .....                                        | 0 \$                                | <input type="checkbox"/> Oui <input type="checkbox"/> Non |
| .....                   | .....                                        | 0 \$                                | <input type="checkbox"/> Oui <input type="checkbox"/> Non |



## EFFETS INDÉSIRABLES

1. Maintenant, nous allons discuter des effets indésirables que vous auriez pu avoir **À CAUSE DE VOTRE TRAITEMENT ACTUEL CONTRE LA DOULEUR** (médicaments analgésiques ou produits naturels)?

Non applicable, car aucun médicament, cannabis ou produit naturel n'a été utilisé pour soulager la douleur.

**ATTENTION : Ne pas inscrire les effets indésirables non reliés au traitement de la douleur.**

*Exemples : Gain de poids relié à la cessation tabagique,  
Vomissements reliés à une intoxication alimentaire.*

|                                       |                                                                          |                                             |                                              |                                              |                                              |
|---------------------------------------|--------------------------------------------------------------------------|---------------------------------------------|----------------------------------------------|----------------------------------------------|----------------------------------------------|
| a) Vertige / étourdissement?          | <input type="checkbox"/> <sub>0</sub> aucun                              | <input type="checkbox"/> <sub>1</sub> léger | <input type="checkbox"/> <sub>2</sub> modéré | <input type="checkbox"/> <sub>3</sub> sévère |                                              |
| b) Somnolence ?                       | <input type="checkbox"/> <sub>0</sub> aucun                              | <input type="checkbox"/> <sub>1</sub> léger | <input type="checkbox"/> <sub>2</sub> modéré | <input type="checkbox"/> <sub>3</sub> sévère |                                              |
| c) Confusion ?                        | <input type="checkbox"/> <sub>0</sub> aucun                              | <input type="checkbox"/> <sub>1</sub> léger | <input type="checkbox"/> <sub>2</sub> modéré | <input type="checkbox"/> <sub>3</sub> sévère |                                              |
| d) Nausée ?                           | <input type="checkbox"/> <sub>0</sub> aucun                              | <input type="checkbox"/> <sub>1</sub> léger | <input type="checkbox"/> <sub>2</sub> modéré | <input type="checkbox"/> <sub>3</sub> sévère |                                              |
| e) Vomissement?                       | <input type="checkbox"/> <sub>0</sub> aucun                              | <input type="checkbox"/> <sub>1</sub> léger | <input type="checkbox"/> <sub>2</sub> modéré | <input type="checkbox"/> <sub>3</sub> sévère |                                              |
| f) Perte de mémoire ?                 | <input type="checkbox"/> <sub>0</sub> aucun                              | <input type="checkbox"/> <sub>1</sub> léger | <input type="checkbox"/> <sub>2</sub> modéré | <input type="checkbox"/> <sub>3</sub> sévère |                                              |
| g) Bouche sèche ?                     | <input type="checkbox"/> <sub>0</sub> aucun                              | <input type="checkbox"/> <sub>1</sub> léger | <input type="checkbox"/> <sub>2</sub> modéré | <input type="checkbox"/> <sub>3</sub> sévère |                                              |
| h) Démangeaison ?                     | <input type="checkbox"/> <sub>0</sub> aucun                              | <input type="checkbox"/> <sub>1</sub> léger | <input type="checkbox"/> <sub>2</sub> modéré | <input type="checkbox"/> <sub>3</sub> sévère |                                              |
| i) Inconfort abdominal ?              | <input type="checkbox"/> <sub>0</sub> aucun                              | <input type="checkbox"/> <sub>1</sub> léger | <input type="checkbox"/> <sub>2</sub> modéré | <input type="checkbox"/> <sub>3</sub> sévère |                                              |
| j) Constipation ?                     | <input type="checkbox"/> <sub>0</sub> aucun                              | <input type="checkbox"/> <sub>1</sub> léger | <input type="checkbox"/> <sub>2</sub> modéré | <input type="checkbox"/> <sub>3</sub> sévère |                                              |
| k) Ralentissement du débit urinaire ? | <input type="checkbox"/> <sub>0</sub> aucun                              | <input type="checkbox"/> <sub>1</sub> léger | <input type="checkbox"/> <sub>2</sub> modéré | <input type="checkbox"/> <sub>3</sub> sévère |                                              |
| l) Fatigue ?                          | Toujours<br>en raison<br>de votre<br>traitement<br>contre la<br>douleur! | <input type="checkbox"/> <sub>0</sub> aucun | <input type="checkbox"/> <sub>1</sub> léger  | <input type="checkbox"/> <sub>2</sub> modéré | <input type="checkbox"/> <sub>3</sub> sévère |
| m) Insomnie ?                         |                                                                          | <input type="checkbox"/> <sub>0</sub> aucun | <input type="checkbox"/> <sub>1</sub> léger  | <input type="checkbox"/> <sub>2</sub> modéré | <input type="checkbox"/> <sub>3</sub> sévère |
| n) Enflure ?                          |                                                                          | <input type="checkbox"/> <sub>0</sub> aucun | <input type="checkbox"/> <sub>1</sub> léger  | <input type="checkbox"/> <sub>2</sub> modéré | <input type="checkbox"/> <sub>3</sub> sévère |
| o) Gain de poids ?                    | <input type="checkbox"/> <sub>0</sub> aucun                              | <input type="checkbox"/> <sub>1</sub> léger | <input type="checkbox"/> <sub>2</sub> modéré | <input type="checkbox"/> <sub>3</sub> sévère |                                              |
| p) Vision brouillée ?                 | <input type="checkbox"/> <sub>0</sub> aucun                              | <input type="checkbox"/> <sub>1</sub> léger | <input type="checkbox"/> <sub>2</sub> modéré | <input type="checkbox"/> <sub>3</sub> sévère |                                              |
| q) Baisse de libido?                  | <input type="checkbox"/> <sub>0</sub> aucun                              | <input type="checkbox"/> <sub>1</sub> léger | <input type="checkbox"/> <sub>2</sub> modéré | <input type="checkbox"/> <sub>3</sub> sévère |                                              |
| r) Hallucinations?                    | <input type="checkbox"/> <sub>0</sub> aucun                              | <input type="checkbox"/> <sub>1</sub> léger | <input type="checkbox"/> <sub>2</sub> modéré | <input type="checkbox"/> <sub>3</sub> sévère |                                              |
| s) Cauchemars?                        | <input type="checkbox"/> <sub>0</sub> aucun                              | <input type="checkbox"/> <sub>1</sub> léger | <input type="checkbox"/> <sub>2</sub> modéré | <input type="checkbox"/> <sub>3</sub> sévère |                                              |
| t) Autres : (spécifiez) _____         | <input type="checkbox"/> <sub>0</sub> aucun                              | <input type="checkbox"/> <sub>1</sub> léger | <input type="checkbox"/> <sub>2</sub> modéré | <input type="checkbox"/> <sub>3</sub> sévère |                                              |
| u) Autres : (spécifiez) _____         | <input type="checkbox"/> <sub>0</sub> aucun                              | <input type="checkbox"/> <sub>1</sub> léger | <input type="checkbox"/> <sub>2</sub> modéré | <input type="checkbox"/> <sub>3</sub> sévère |                                              |





## PERTE DE PRODUCTIVITÉ

---

1. Au cours des 3 derniers mois, aviez-vous un travail rémunéré?

<sub>1</sub> Oui <sub>0</sub> Non

SI « **OUI** » ADMINISTRER LA SECTION A ET B

SI « **NON** » ADMINISTRER LA SECTION B SEULEMENT

### SECTION A

1.1. Au cours des 3 derniers mois, combien de jours avez-vous été **absent(e)** de votre travail rémunéré en raison d'une **VISITE MÉDICALE RELIÉE AU TRAITEMENT DE VOTRE DOULEUR?**

*Incluant la participation à une école interactionnelle, les rendez-vous à la clinique de la douleur, les hospitalisations, les visites à l'urgence, les visites chez un médecin, les visites chez un professionnel de la santé et les visites à la pharmacie, etc.*

Nombre de journées: \_\_\_\_\_

1.2. Au cours des 3 derniers mois, combien de jours avez-vous été **absent(e)** de votre travail rémunéré **À CAUSE DE VOTRE DOULEUR?**

*Exemples : Vous aviez trop mal pour travailler, vous étiez inconfortable, vous êtes arrivé en retard, etc.*

Nombre de journées: \_\_\_\_\_

1.3. En moyenne, combien de jours par semaine êtes-vous normalement supposé travaillé?

Nombre de journées: \_\_\_\_\_ /semaine

1 journée = 7.5 ou 8 heures

1.4. Grâce à votre travail rémunéré, quel était **VOTRE** revenu annuel avant impôts au cours des 3 derniers mois?

- <sub>0</sub> Moins de 10 000 \$
- <sub>1</sub> Entre 10 000 \$ et 19 999 \$
- <sub>2</sub> Entre 20 000 \$ et 29 999 \$
- <sub>3</sub> Entre 30 000 \$ et 39 999 \$
- <sub>4</sub> Entre 40 000 \$ et 49 999 \$
- <sub>5</sub> Entre 50 000 \$ et 59 999 \$
- <sub>6</sub> Entre 60 000 \$ et 69 999 \$
- <sub>7</sub> Entre 70 000 \$ et 79 999 \$
- <sub>8</sub> Entre 80 000 \$ et 89 000 \$
- <sub>9</sub> Entre 90 000 \$ et 99 000 \$
- <sub>10</sub> 100 000 \$ et plus

Ne désire pas répondre

|                  |
|------------------|
| <b>SECTION B</b> |
|------------------|

**Les questions suivantes portent sur le travail au foyer NON RÉMUNÉRÉ, incluant les tâches domestiques et celles liées aux soins des enfants et des proches.**

- 1.5. Au cours des 3 derniers mois, combien de jours avez-vous été obligé(e) de cesser votre **travail au foyer non rémunéré** en raison d'une **VISITE MÉDICALE RELIÉE AU TRAITEMENT DE VOTRE DOULEUR?**

*Incluant la participation à une école interactionnelle, les rendez-vous à la clinique de la douleur, les hospitalisations, les visites à l'urgence, les visites chez un médecin, les visites chez un professionnel de la santé et les visites à la pharmacie, etc.*

Nombre de journées: \_\_\_\_\_

- 1.6. Au cours des 3 derniers mois, combien de jours avez-vous été obligé(e) de cesser votre **travail au foyer non rémunéré À CAUSE DE VOTRE DOULEUR?**

*Exemples : Vous aviez trop mal pour effectuer vos tâches, vous étiez inconfortable etc.*

Nombre de journées: \_\_\_\_\_

### **PROPENSITÉ À PAYER POUR L'INTERVENTION**

---

Pour finir, une petite mise en situation...

Nous allons faire comme si vous aviez à payer pour participer aux Écoles Interactionnelles offertes dans votre région. Bien sûr, dans la réalité, votre participation présente ou future aux Écoles Interactionnelles est entièrement gratuite!

Compte tenu de vos symptômes douloureux, quel montant maximum seriez-vous prêt à payer pour participer à l'École interactionnelle de \_\_\_\_\_ :

\_\_\_\_\_ \$

---

**LE QUESTIONNAIRE SE TERMINE ICI.**

**EST-CE QUE VOUS AVEZ DES QUESTIONS?**

**SI CE N'EST PAS DÉJÀ FAIT, JE VOUS INVITE ÉGALEMENT À RETOURNER VOTRE QUESTIONNAIRE PAPIER**

**JE VOUS REMERCIE BEAUCOUP DE VOTRE PARTICIPATION!**

**NOUS NOUS REPARLERONS DANS ENVIRON 2 MOIS POUR UNE ENTREVUE SIMILAIRE.**

---
